# Supplementary material
Source: Research Square preprint supplement (doi:10.21203/rs.3.rs-9815073/v1)
Supplement: Supplementary file 1 [file 7c0f789832739ec5aecc2cf1.docx]

Table 1. The solid mechanics journals indexed by Web of Science (WoS) during 1970–1999, and the number of papers published in the journals.

| JOURNALS | 1970-1979 | 1980-1989 | 1990-1999 | 1970-1999 |
| --- | --- | --- | --- | --- |
| ACTA MECHANICA | 608 | 921 | 997 | 2526 |
| ACTA MECHANICA SOLIDA SINICA | - | - | 179 | 179 |
| APP. MATH. & MECH.-ENG. EDITION | - | - | 460 | 460 |
| ARCH. FOR RATIONAL MECH. AND ANALY. | 772 | 625 | 562 | 1959 |
| ARCH. OF APPLIED MECHANICS | - | - | 495 | 495 |
| ARCHIVES OF MECHANICS | 677 | 609 | - | 1286 |
| COMPUTATIONAL MECHANICS | - | - | 567 | 567 |
| COMP. METH. IN APP. MECH. AND ENG. | 187 | 1082 | 2167 | 3436 |
| COMPOSITE STRUCTURES | - | 230 | 1122 | 1352 |
| ENG. FRACTURE MECHANICS | 461 | 1753 | 2227 | 4441 |
| EUR. J. OF MECHANICS A-SOLIDS | - | - | 504 | 504 |
| EXPERIMENTAL MECHANICS | 1445 | 1050 | 570 | 3065 |
| FAT. & FRAC. OF ENG. MAT & STRUC. | - | 189 | 1093 | 1282 |
| INTERNATIONAL APP. MECHANICS. | - | - | 1204 | 1204 |
| INT. J. FOR NUM. AND ANAL. METH. IN GEOMECHANICS | 59 | 378 | 516 | 953 |
| INT. J. OF APP. ELECTROMAGNETICS AND MECH. | - | - | 161 | 161 |
| INT. JOURNAL OF ENG. SCIENCE | 898 | 1280 | 1332 | 3510 |
| INT. JOURNAL OF FATIGUE | 24 | 270 | 688 | 982 |
| INT. JOURNAL OF FRACTURE | 729 | 1022 | 1953 | 3704 |
| INT. J. OF MECHANICAL SCIENCES | 876 | 706 | 831 | 2413 |
| INT. J. OF NON-LINEAR MECHANICS | 109 | 434 | 698 | 1241 |
| INT. JOURNAL OF IMPACT ENG. | - | 48 | 830 | 878 |
| INT. JOURNAL OF PLASTICITY | - | 95 | 496 | 591 |
| INT. J. OF ROCK MECH. AND MINING SCI. | 462 | 313 | 309 | 1084 |
| INT. J. OF SOLIDS AND STRUCTURES | 342 | 952 | 2210 | 3504 |
| J. OF APP. MECH.-TRANS. OF THE ASME | 1612 | 1991 | 1836 | 5439 |
| JOURNAL OF ELASTICITY | 199 | 302 | 489 | 990 |
| JOURNAL OF ENGINEERING MECH. | 111 | 248 | - | 359 |
| J. OF ENG. MAT. AND TECH.-TRAN. OF THE ASME | 413 | 573 | 710 | 1696 |
| J. OF THE MECH. AND PHY. OF SOLIDS | 277 | 294 | 801 | 1372 |
| J. OF OFFSHORE MECH. AND ARCTIC ENG.-TRAN. OF THE ASME | - | - | 242 | 242 |
| J. OF PRES. VESSEL TECH.-TRANS. OF THE ASME | 124 | 601 | 713 | 1438 |
| J. OF STRAIN ANALYSIS FOR ENG. DESIGN | 76 | 293 | 370 | 739 |
| JOURNAL OF THERMAL STRESSES | 53 | 276 | 383 | 712 |
| MATH. AND MECHANICS OF SOLIDS | - | - | 110 | 110 |
| MECCANICA | - | - | 251 | 251 |
| MECH. OF COMPOSITE MATERIALS | - | 493 | 917 | 1410 |
| MECHANICS OF MATERIALS | - | 212 | 572 | 784 |
| MECH. RESEARCH COMMUNICATIONS | 379 | 522 | 763 | 1664 |
| PROBABILISTIC ENG. MECHANICS | - | - | 163 | 163 |
| QUAR. J. OF MECH. AND APP. MATH. | 345 | 354 | 359 | 1058 |
| THEOR. AND APP. FRACTURE MECH. |  | 237 | 482 | 719 |
| THEORETICAL AND APP. MECHANICS | - | 24 | 130 | 154 |
| STRUCTURAL ENG. AND MECHANICS | - | - | 307 | 307 |
| ROCK MECH. AND ROCK ENG. | - | 111 | 160 | 271 |
| THIN-WALLED STRUCTURES | - | 159 | 615 | 774 |

Table 2: The contributing papers and their characteristics

| No | Paper addresses (DOI) | Modelling Context of Paper | Country | Affiliations | AYC5 |
| --- | --- | --- | --- | --- | --- |
| 1 | 10.1016/S0022-5096(98)00103-3 | Theoretical modelling  (Mech. behavior of metals) | USA | Stanford Univ.;  Univ. of Illinois ;  Harvard Univ. | 133 |
| 2 | (International Journal of Fracture, Vol., Is.1-4, Page XI-XVIII) | Theoretical modelling  (Mech. behavior of metals) | Russia | Leningrad Tech. Univ. | 109 |
| 3 | 10.1080/01495739808956165 | Numerical Modelling.  (Mech. behavior of heterogeneous domains) | USA | Texas A&M Univ. | 86 |
| 4 | 10.1007/s004660050346 | Numerical Modelling  (An approach for comp. mechanics) | USA | Univ. of California LA | 75 |
| 5 | 10.1016/S0022-5096(98)00034-9 | Theoretical modelling  (Mech. behavior of metals) | France | Univ. Paris 13 | 283 |
| 6 | 10.1016/S0045-7825(97)00218-1 | Numerical Modelling  (Mech. behavior of heterogeneous domains) | France | CNRS;  Aix-Marseille Univ. | 101 |
| 7 | 10.1016/S0022-5096(97)00086-0 | Theoretical modelling.  (Mech. behavior of metals) | USA | Stanford Univ. | 227 |
| 8 | 10.1016/S1365-1609(97)80069-X | Empirical modelling  (Mech. behavior of rock) | Canada;  Australia | Univ. of Queensland | 209 |
| 9 | 10.1016/0020-7683(95)00255-3 | Numerical Modelling  (An approach for comp. mechanics) | USA | Brown Univ. | 70 |
| 10 | 10.1016/0022-5096(94)90003-5 | Numerical Modelling  (An approach for comp. mechanics) | USA | Brown Univ. | 93 |
| 11 | 10.1016/0956-7151(94)90502-9 | Theoretical modelling.  (Mech. behavior of metals) | USA | Harvard Univ. | 93 |
| 12 | 10.1016/0022-5096(93)90072-N | Theoretical modelling.  (Mech. behavior of metals) | Englad; USA | Univ. of Cambridge;  Harvard Univ. | 57 |
| 13 | 10.1007/BF00044969 | Theoretical modelling.  (Mech. behavior of metals) | USA | Univ. of Cal. Berkeley | 176 |
| 14 | 10.1016/0022-5096(93)90013-6 | Empirical modelling  (Mech. behavior of rubbers) | USA | MIT | 153 |
| 15 | 10.1016/0022-5096(92)90020-3 | Theoretical modelling.  (Mech. behavior of metals) | USA | Harvard Univ. | 51 |
| 16 | 10.1080/01495739208946136 | Theoretical modelling  (Mech. behavior of elastic domains) | USA | Univ. of Cal. Berkeley | 130 |
| 17 | 10.1016/S0022-5096(05)80012-2 | Theoretical modelling  (Mech. behavior of metals) | USA | Harvard Univ. | 61 |
| 18 | 10.1016/0020-7683(89)90050-4 | Theoretical modelling  (Mech. behavior of concrete) | Spain | Univ. Politecnica de Catalunya | 360 |
| 19 | 10.1016/0045-7825(88)90086-2 | Numerical Modelling  (An approach for comp. mechanics) | Denmark, USA | Tech. Univ. of Denmark;  Univ. of Michigan | 423 |
| 20 | 10.1115/1.3173064 | Theoretical modelling  (Mech. behavior of metals) | USA | Brown Univ. | 62 |
| 21 | 10.1007/BF02325092 | Theoretical modelling  (Data evaluation for experimental mechanics) | USA | Polytechnic Institute of NY;  Univ. of South Ca. Columbia | 110 |
| 22 | 10.1016/0013-7944(85)90052-9 | Empirical modelling  (Mech. behavior of metals) | USA | US Department of Defense;  US Air Force | 414 |
| 23 | 10.1115/1.3225775 | Theoretical modelling.  (Mech. behavior of metals) | France | Univ. Paris 6 | 162 |
| 24 | 10.1115/1.3167719 | Theoretical modelling  (Mech. behavior of composites) | USA | Virginia Polytechnic Institute and State Univ. | 192 |
| 25 | 10.1016/0001-6160(84)90213-X | Numerical Modelling  (An approach for comp. mechanics) | USA | Brown Univ. | 174 |
| 26 | 10.1063/1.332803 | Theoretical modelling  (Mech. behavior of metals) | USA | Princeton Univ. | 322 |
| 27 | 10.1007/BF00036191 | Theoretical modelling.  (Mech behavior of metals) | Denmark | Tech. Univ. of Denmark | 76 |
| 28 | 10.1115/1.3153664 | Theoretical modelling  (Mech. behavior of heterogeneous domains) | Israel | Tel Aviv Univ. | 325 |
| 29 | 10.1016/0022-5096(79)90032-2 | Theoretical modelling  (Mech. behavior of heterogeneous domains) | USA | Univ. of California ;  Shell Development Comp. | 73 |
| 30 | 10.1115/1.3443401 | Theoretical modelling  (Mech. behavior of metals) | USA | Brown Univ. | 265 |
| 31 | 10.1007/bf00261375 | Theoretical modelling  (Mech. behavior of metals) | USA;  England | Carnegie Mellon Univ.;  Univ.of East Anglia | 170 |
| 32 | [10.1016/0022-5096(75)90001-0](https://doi.org/10.1016/0022-5096(75)90001-0) | Theoretical modelling  (Mech. behavior of rocks) | USA | Brown Univ. | 59 |
| 33 | [10.1016/0001-6160(73)90064-3](https://doi.org/10.1016/0001-6160(73)90064-3) | Theoretical modelling  (Mech. behavior of heterogeneous domains) | Japan | Nat. Res. Ins. for Metals;  Tokyo Ins. of Tech. | 359 |
| 34 | 10.1016/0020-7225(72)90039-0 | Theoretical modelling.  (Mech. behavior of metals) | USA | Princeton Univ.;  Lehigh Univ. | 224 |
| 35 | 10.1098/rspa.1972.0026 | Theoretical modelling.  (Mech. behavior of rubbers) | England | Univ.of East Anglia | 154 |
| 36 | 10.1080/14786437008238426 | Theoretical modelling  (Mech. behavior of heterogeneous domains) | USA | Harvard Univ. | 216 |

Table 3. The authors of contributing papers.

| AUTHORS | Paper numbers given in Table 2 | | | | | | | | | | | | | | | | | | | | | | | | | | | | | | | | | | | |
| --- | --- | --- | --- | --- | --- | --- | --- | --- | --- | --- | --- | --- | --- | --- | --- | --- | --- | --- | --- | --- | --- | --- | --- | --- | --- | --- | --- | --- | --- | --- | --- | --- | --- | --- | --- | --- |
| 1 | 2 | 3 | 4 | 5 | 6 | 7 | 8 | 9 | 10 | 11 | 12 | 13 | 14 | 15 | 16 | 17 | 18 | 19 | 20 | 21 | 22 | 23 | 24 | 25 | 26 | 27 | 28 | 29 | 30 | 31 | 32 | 33 | 34 | 35 | 36 |
| Gao, H | x |  |  |  |  |  |  |  |  |  |  |  |  |  |  |  |  |  |  |  |  |  |  |  |  |  |  |  |  |  |  |  |  |  |  |  |
| Huang, Y | x |  |  |  |  |  |  |  |  |  |  |  |  |  |  |  |  |  |  |  |  |  |  |  |  |  |  |  |  |  |  |  |  |  |  |  |
| Nix, WD | x |  |  |  |  |  |  |  |  |  |  |  |  |  |  |  |  |  |  |  |  |  |  |  |  |  |  |  |  |  |  |  |  |  |  |  |
| Hutchinson, JW | x |  |  |  |  |  |  |  |  |  | x | x |  |  | x |  |  |  |  |  |  |  |  |  |  |  |  |  |  |  |  |  |  |  |  |  |
| Kachanov, LM |  | x |  |  |  |  |  |  |  |  |  |  |  |  |  |  |  |  |  |  |  |  |  |  |  |  |  |  |  |  |  |  |  |  |  |  |
| Reddy, JN |  |  | x |  |  |  |  |  |  |  |  |  |  |  |  |  |  |  |  |  |  |  |  |  |  |  |  |  |  |  |  |  |  |  |  |  |
| Chin, CD |  |  | x |  |  |  |  |  |  |  |  |  |  |  |  |  |  |  |  |  |  |  |  |  |  |  |  |  |  |  |  |  |  |  |  |  |
| Atluri, SN |  |  |  | x |  |  |  |  |  |  |  |  |  |  |  |  |  |  |  |  |  |  |  |  |  |  |  |  |  |  |  |  |  |  |  |  |
| Zhu, T |  |  |  | x |  |  |  |  |  |  |  |  |  |  |  |  |  |  |  |  |  |  |  |  |  |  |  |  |  |  |  |  |  |  |  |  |
| Francfort, GA |  |  |  |  | x |  |  |  |  |  |  |  |  |  |  |  |  |  |  |  |  |  |  |  |  |  |  |  |  |  |  |  |  |  |  |  |
| Marigo, JJ |  |  |  |  | x |  |  |  |  |  |  |  |  |  |  |  |  |  |  |  |  |  |  |  |  |  |  |  |  |  |  |  |  |  |  |  |
| Moulinec, H |  |  |  |  |  | x |  |  |  |  |  |  |  |  |  |  |  |  |  |  |  |  |  |  |  |  |  |  |  |  |  |  |  |  |  |  |
| Suquet, P |  |  |  |  |  | x |  |  |  |  |  |  |  |  |  |  |  |  |  |  |  |  |  |  |  |  |  |  |  |  |  |  |  |  |  |  |
| Nix, WD |  |  |  |  |  |  | x |  |  |  |  |  |  |  |  |  |  |  |  |  |  |  |  |  |  |  |  |  |  |  |  |  |  |  |  |  |
| Gao, HJ |  |  |  |  |  |  | x |  |  |  |  |  |  |  |  |  |  |  |  |  |  |  |  |  |  |  |  |  |  |  |  |  |  |  |  |  |
| Hoek, E |  |  |  |  |  |  |  | x |  |  |  |  |  |  |  |  |  |  |  |  |  |  |  |  |  |  |  |  |  |  |  |  |  |  |  |  |
| Brown, ET |  |  |  |  |  |  |  | x |  |  |  |  |  |  |  |  |  |  |  |  |  |  |  |  |  |  |  |  |  |  |  |  |  |  |  |  |
| Camacho, GT |  |  |  |  |  |  |  |  | x |  |  |  |  |  |  |  |  |  |  |  |  |  |  |  |  |  |  |  |  |  |  |  |  |  |  |  |
| Ortiz, M |  |  |  |  |  |  |  |  | x |  |  |  |  |  |  |  |  |  |  |  |  |  |  |  |  |  |  |  |  |  |  |  |  |  |  |  |
| Xu, XP |  |  |  |  |  |  |  |  |  | x |  |  |  |  |  |  |  |  |  |  |  |  |  |  |  |  |  |  |  |  |  |  |  |  |  |  |
| Needleman, A |  |  |  |  |  |  |  |  |  | x |  |  |  |  |  |  |  |  |  | x |  |  |  |  | x |  |  |  |  |  |  |  |  |  |  |  |
| Fleck, NA |  |  |  |  |  |  |  |  |  |  | x | x |  |  |  |  |  |  |  |  |  |  |  |  |  |  |  |  |  |  |  |  |  |  |  |  |
| Muller, GM |  |  |  |  |  |  |  |  |  |  | x |  |  |  |  |  |  |  |  |  |  |  |  |  |  |  |  |  |  |  |  |  |  |  |  |  |
| Ashby, MF |  |  |  |  |  |  |  |  |  |  | x |  |  |  |  |  |  |  |  |  |  |  |  |  |  |  |  |  |  |  |  |  |  |  |  | x |
| Green, AE |  |  |  |  |  |  |  |  |  |  |  |  | x |  |  | x |  |  |  |  |  |  |  |  |  |  |  |  |  |  |  |  |  |  |  |  |
| Naghdi, PM |  |  |  |  |  |  |  |  |  |  |  |  | x |  |  | x |  |  |  |  |  |  |  |  |  |  |  |  |  |  |  |  |  |  |  |  |
| Arruda EM |  |  |  |  |  |  |  |  |  |  |  |  |  | x |  |  |  |  |  |  |  |  |  |  |  |  |  |  |  |  |  |  |  |  |  |  |
| Boyce, MC |  |  |  |  |  |  |  |  |  |  |  |  |  | x |  |  |  |  |  |  |  |  |  |  |  |  |  |  |  |  |  |  |  |  |  |  |
| Tvergaard, V |  |  |  |  |  |  |  |  |  |  |  |  |  |  | x |  |  |  |  |  |  |  |  |  | x |  | x |  |  |  |  |  |  |  |  |  |
| Rice, JR |  |  |  |  |  |  |  |  |  |  |  |  |  |  |  |  | x |  |  |  |  |  |  |  |  |  |  |  |  |  |  | x |  |  |  |  |
| Lubliner, J |  |  |  |  |  |  |  |  |  |  |  |  |  |  |  |  |  | x |  |  |  |  |  |  |  |  |  |  |  |  |  |  |  |  |  |  |
| Oliver, J |  |  |  |  |  |  |  |  |  |  |  |  |  |  |  |  |  | x |  |  |  |  |  |  |  |  |  |  |  |  |  |  |  |  |  |  |
| Oller, S |  |  |  |  |  |  |  |  |  |  |  |  |  |  |  |  |  | x |  |  |  |  |  |  |  |  |  |  |  |  |  |  |  |  |  |  |
| Onate, E |  |  |  |  |  |  |  |  |  |  |  |  |  |  |  |  |  | x |  |  |  |  |  |  |  |  |  |  |  |  |  |  |  |  |  |  |
| Bendsoe, MP |  |  |  |  |  |  |  |  |  |  |  |  |  |  |  |  |  |  | x |  |  |  |  |  |  |  |  |  |  |  |  |  |  |  |  |  |
| Kikuchi, N |  |  |  |  |  |  |  |  |  |  |  |  |  |  |  |  |  |  | x |  |  |  |  |  |  |  |  |  |  |  |  |  |  |  |  |  |
| Chu, TC |  |  |  |  |  |  |  |  |  |  |  |  |  |  |  |  |  |  |  |  | x |  |  |  |  |  |  |  |  |  |  |  |  |  |  |  |
| Ranson, Wf |  |  |  |  |  |  |  |  |  |  |  |  |  |  |  |  |  |  |  |  | x |  |  |  |  |  |  |  |  |  |  |  |  |  |  |  |
| Sutton, MA |  |  |  |  |  |  |  |  |  |  |  |  |  |  |  |  |  |  |  |  | x |  |  |  |  |  |  |  |  |  |  |  |  |  |  |  |
| Peters, WH |  |  |  |  |  |  |  |  |  |  |  |  |  |  |  |  |  |  |  |  | x |  |  |  |  |  |  |  |  |  |  |  |  |  |  |  |
| Johnson, G |  |  |  |  |  |  |  |  |  |  |  |  |  |  |  |  |  |  |  |  |  | x |  |  |  |  |  |  |  |  |  |  |  |  |  |  |
| Cook, WH |  |  |  |  |  |  |  |  |  |  |  |  |  |  |  |  |  |  |  |  |  | x |  |  |  |  |  |  |  |  |  |  |  |  |  |  |
| Lemaitre, J |  |  |  |  |  |  |  |  |  |  |  |  |  |  |  |  |  |  |  |  |  |  | x |  |  |  |  |  |  |  |  |  |  |  |  |  |
| Reddy, JN |  |  |  |  |  |  |  |  |  |  |  |  |  |  |  |  |  |  |  |  |  |  |  | x |  |  |  |  |  |  |  |  |  |  |  |  |
| Eringen, AC |  |  |  |  |  |  |  |  |  |  |  |  |  |  |  |  |  |  |  |  |  |  |  |  |  | x |  |  |  |  |  |  |  | x |  |  |
| Hashin, Z |  |  |  |  |  |  |  |  |  |  |  |  |  |  |  |  |  |  |  |  |  |  |  |  |  |  |  | x |  |  |  |  |  |  |  |  |
| Christensen, RM |  |  |  |  |  |  |  |  |  |  |  |  |  |  |  |  |  |  |  |  |  |  |  |  |  |  |  |  | x |  |  |  |  |  |  |  |
| Lo, KH |  |  |  |  |  |  |  |  |  |  |  |  |  |  |  |  |  |  |  |  |  |  |  |  |  |  |  |  | x |  |  |  |  |  |  |  |
| Gurson, AL |  |  |  |  |  |  |  |  |  |  |  |  |  |  |  |  |  |  |  |  |  |  |  |  |  |  |  |  |  | x |  |  |  |  |  |  |
| Gurtin, ME |  |  |  |  |  |  |  |  |  |  |  |  |  |  |  |  |  |  |  |  |  |  |  |  |  |  |  |  |  |  | x |  |  |  |  |  |
| Murdoch, AI |  |  |  |  |  |  |  |  |  |  |  |  |  |  |  |  |  |  |  |  |  |  |  |  |  |  |  |  |  |  | x |  |  |  |  |  |
| Rudnicki, JW |  |  |  |  |  |  |  |  |  |  |  |  |  |  |  |  |  |  |  |  |  |  |  |  |  |  |  |  |  |  |  | x |  |  |  |  |
| Mori, T |  |  |  |  |  |  |  |  |  |  |  |  |  |  |  |  |  |  |  |  |  |  |  |  |  |  |  |  |  |  |  |  | x |  |  |  |
| Tanaka, K |  |  |  |  |  |  |  |  |  |  |  |  |  |  |  |  |  |  |  |  |  |  |  |  |  |  |  |  |  |  |  |  | x |  |  |  |
| Edelen, DGB |  |  |  |  |  |  |  |  |  |  |  |  |  |  |  |  |  |  |  |  |  |  |  |  |  |  |  |  |  |  |  |  |  | x |  |  |
| Ogden, RW |  |  |  |  |  |  |  |  |  |  |  |  |  |  |  |  |  |  |  |  |  |  |  |  |  |  |  |  |  |  |  |  |  |  | x |  |
